# Supplementary material for: Integrative analysis of genomic and epigenomic regulation of the transcriptome in liver cancer
Source: PubMed Central journal article supplement (PMC5635060; doi:10.1038/s41467-017-00991-w), 2017-10-10
Supplement: 41467_2017_991_MOESM2_ESM.pdf [file 41467_2017_991_MOESM2_ESM.pdf]

### **Description of Supplementary Files**

File Name: Supplementary Information

Description: Supplementary tables and Supplementary Figures

File Name: Supplementary Data 1

Description: List of CNVcor and METcor genes

**Supplementary Table 1. List of molecular classification signatures for HCC**

| Description                                                  | Gene signature name   | Number of genes | Authors         | Publication Year | PMID     |
|--------------------------------------------------------------|-----------------------|-----------------|-----------------|------------------|----------|
| 5-gene signature                                             | Villa                 | 5               | Villa et al     | 2015             | 25666192 |
| 17-gene metastasis predictor                                 | Budhu                 | 17              | Budhu et al     | 2006             | 16904609 |
| EpCAM-signature                                              | Yamashita_EpCam_UP    | 53              | Yamashita et al | 2008             | 18316609 |
|                                                              | Yamashita_EpCam_DOWN  | 18              |                 |                  |          |
| 186-gene signature                                           | Hoshida_good_survival | 113             | Hoshida et al   | 2008             | 18923165 |
|                                                              | Hoshida_poor_survival | 73              |                 |                  |          |
| 65-gene signature                                            | Kim_65gene_posCor     | 22              | Kim et al       | 2012             | 22105560 |
|                                                              | Kim_65gene_negCor     | 43              |                 |                  |          |
| 233-gene signature for hepatic injury and regeneration (HIR) | Kim_HIR_UP            | 170             | Kim et al       | 2014             | 25536056 |
|                                                              | Kim_HIR_DOWN          | 63              |                 |                  |          |
| 6 group classifier                                           | Boyault_G123_UP       | 45              | Boyault et al   | 2006             | 17187432 |
|                                                              | Boyault_G123_DOWN     | 50              |                 |                  |          |
|                                                              | Boyault_G56_UP        | 12              |                 |                  |          |
|                                                              | Boyault_G56_DOWN      | 17              |                 |                  |          |
| Portal thrombosis signature                                  | Roessler_PT_UP        | 108             | Roessler et al  | 2010             | 21159642 |
|                                                              | Roessler_PT_DOWN      | 53              |                 |                  |          |
| Cholangiocarcinoma-Like                                      | Woo_CLHCC_UP          | 251             | Woo et al       | 2010             | 20395200 |
|                                                              | Woo_CLHCC_DOWN        | 374             |                 |                  |          |

HIR; Hepatic injury and regeneration, PT; Portal vein thrombosis, CLHCC; cholangiocarcinoma-like Hepatocellular carcinoma

## Supplementary Table 2. List of qRT-PCR primers for stemness genes

| Gene         |         | Primer sequences            |
|--------------|---------|-----------------------------|
| <i>BAP1</i>  | Forward | 5`-CTACCACGACATCCGCTTCA-3`  |
|              | Reverse | 5`-CAGGCAGCTGTGACTCTTGA-3`  |
| <i>CA9</i>   | Forward | 5`-TACAGCTGAACTCCGAGCG-3`   |
|              | Reverse | 5`-CTAGGCTCCAGTCTCGGCTA-3`  |
| <i>KRT19</i> | Forward | 5`-AGATTGAACCGGGAGGTTCG-3`  |
|              | Reverse | 5`-CCTGATTCTGCCGCTCACTA-3`  |
| <i>EPCAM</i> | Forward | 5`-GTGCTGGTGTGTGAACACTG-3`  |
|              | Reverse | 5`-GAAGTGCAGTCCGCAAACCTT-3` |
| <i>PROM1</i> | Forward | 5`-TCACCAGCAACGAGTCCTTC-3`  |
|              | Reverse | 5`-GGTTTGACGATGCCACTTT-3`   |

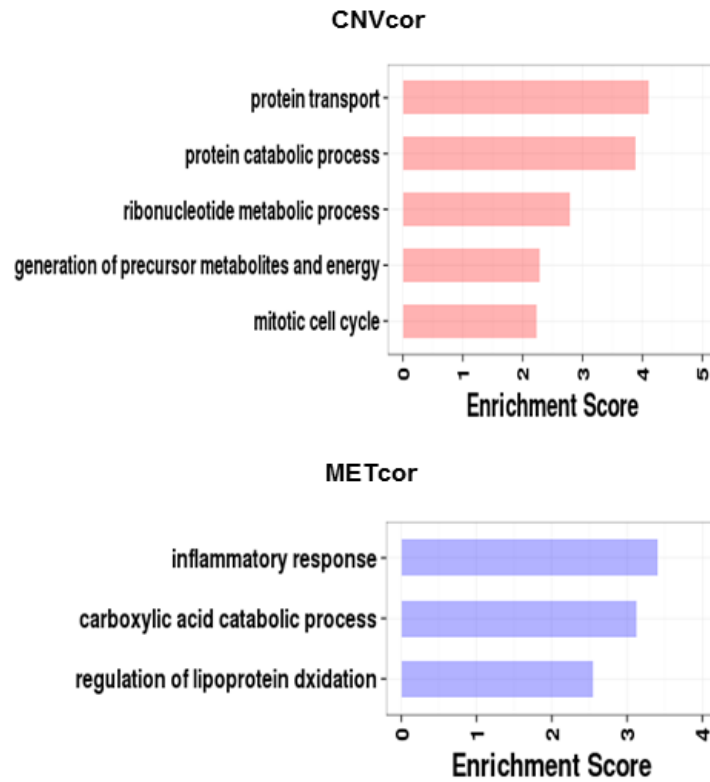

**Supplementary Figure 1. Gene ontology analysis of CNVcor and METcor genes**

Gene ontology (GO) analyses are performed using CNVcor (top) and METcor (bottom) genes using DAVID software (<https://david.ncifcrf.gov>). Enrichment scores of GO terms are shown.

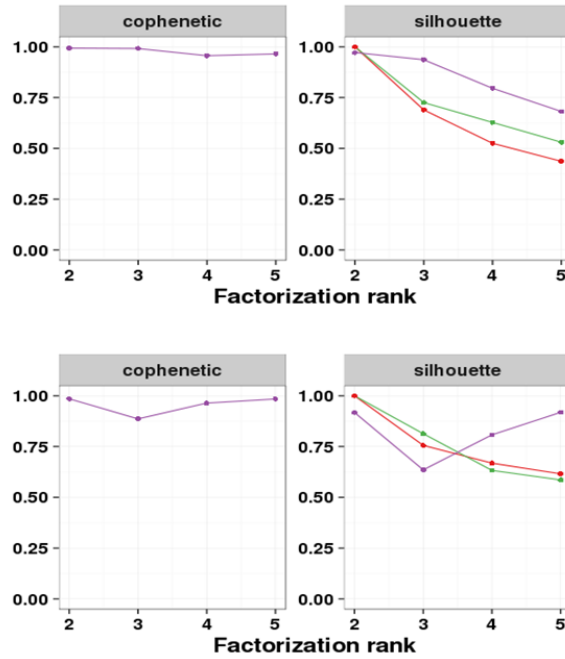

**Supplementary Figure 2. NMF clustering analysis of CNVcor and METcor genes**

NMF cluster analyses are performed for CNVcor (A) and METcor (B) genes. The cluster numbers of K=2,3,4,5 are examined and their cophenetic correlation between clusters and the average silhouette width of the consensus membership matrix as determined by the R package 'NMF'.

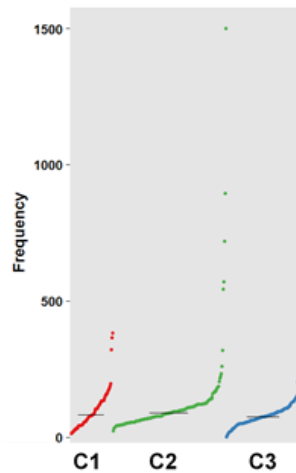

**Supplementary Figure 3. Mutation frequencies among the HCC subgroups**

Mutation frequencies of individual samples among the subtypes of C1, C2, and C3 are shown. Median of the mutation frequencies in each subtype are indicated by horizontal lines.
